# Supplementary material for: Long non-coding RNA UBE2CP3 promotes tumor metastasis by inducing epithelial-mesenchymal transition in hepatocellular carcinoma
Source: PubMed Central journal article supplement (PMC5630337; doi:10.18632/oncotarget.18524), 2017-06-16
Supplement: oncotarget-08-65370-s001.pdf [file oncotarget-08-65370-s001.pdf]

# Long non-coding RNA UBE2CP3 promotes tumor metastasis by inducing epithelial-mesenchymal transition in hepatocellular carcinoma

## Supplementary Materials

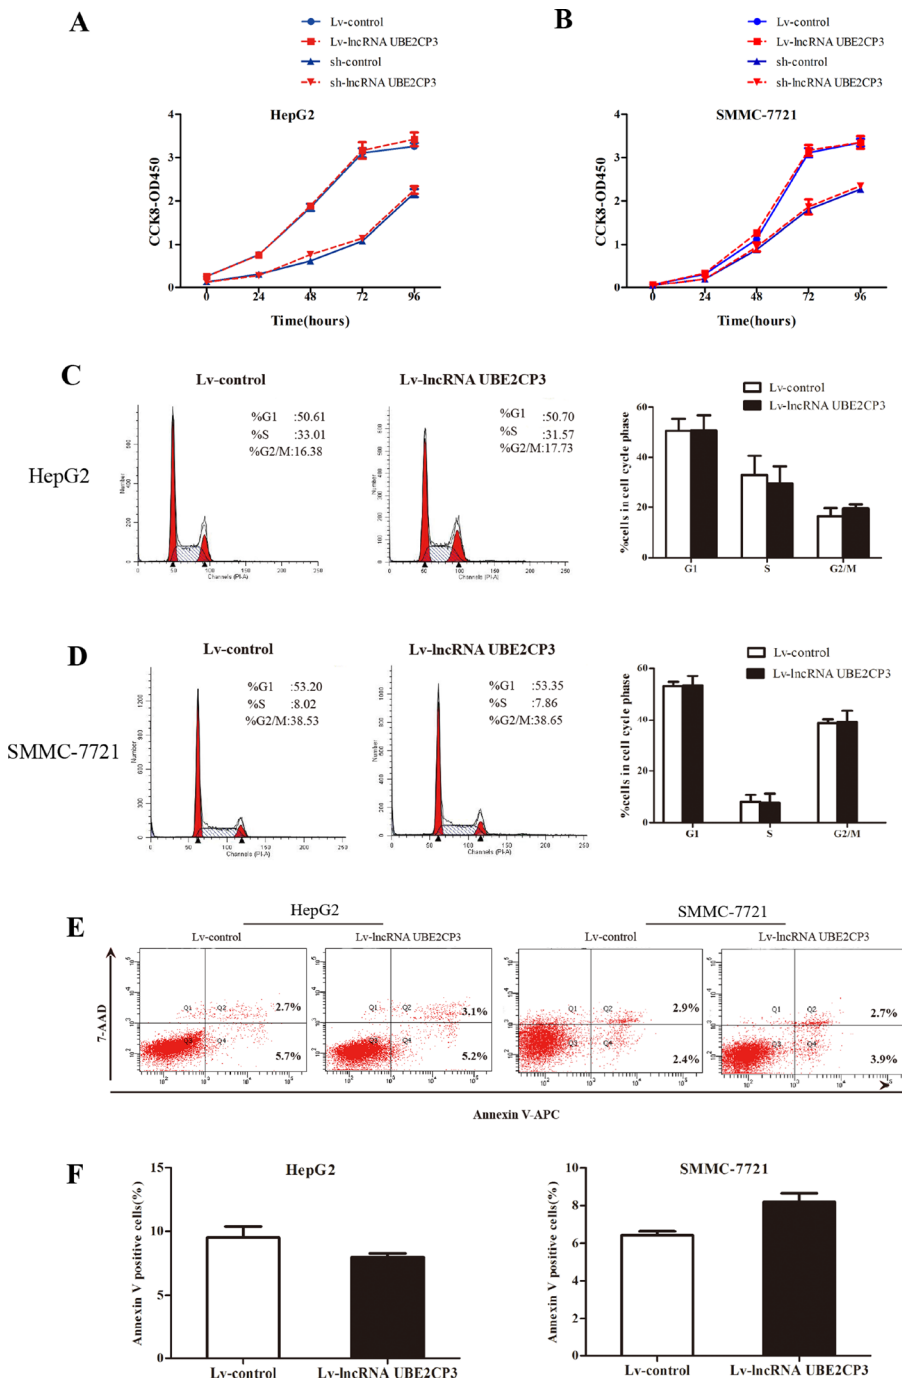

**Supplementary Figure 1: LncRNA UBE2CP3 shows no effect on cell proliferation, cell cycle progression and cell apoptosis *in vitro*.** (A–B) After over-expression and knockdown of lncRNA UBE2CP3 in HepG2 and SMMC-7721 cells, the cell viability was assessed by CCK-8 assays daily for 4 days. (C–D) Cell cycle analysis of over-expression of lncRNA UBE2CP3 in HepG2 and SMMC-7721 cells. (E–F) Cell apoptosis analysis of over-expression of lncRNA UBE2CP3 in HepG2 and SMMC-7721 cells.

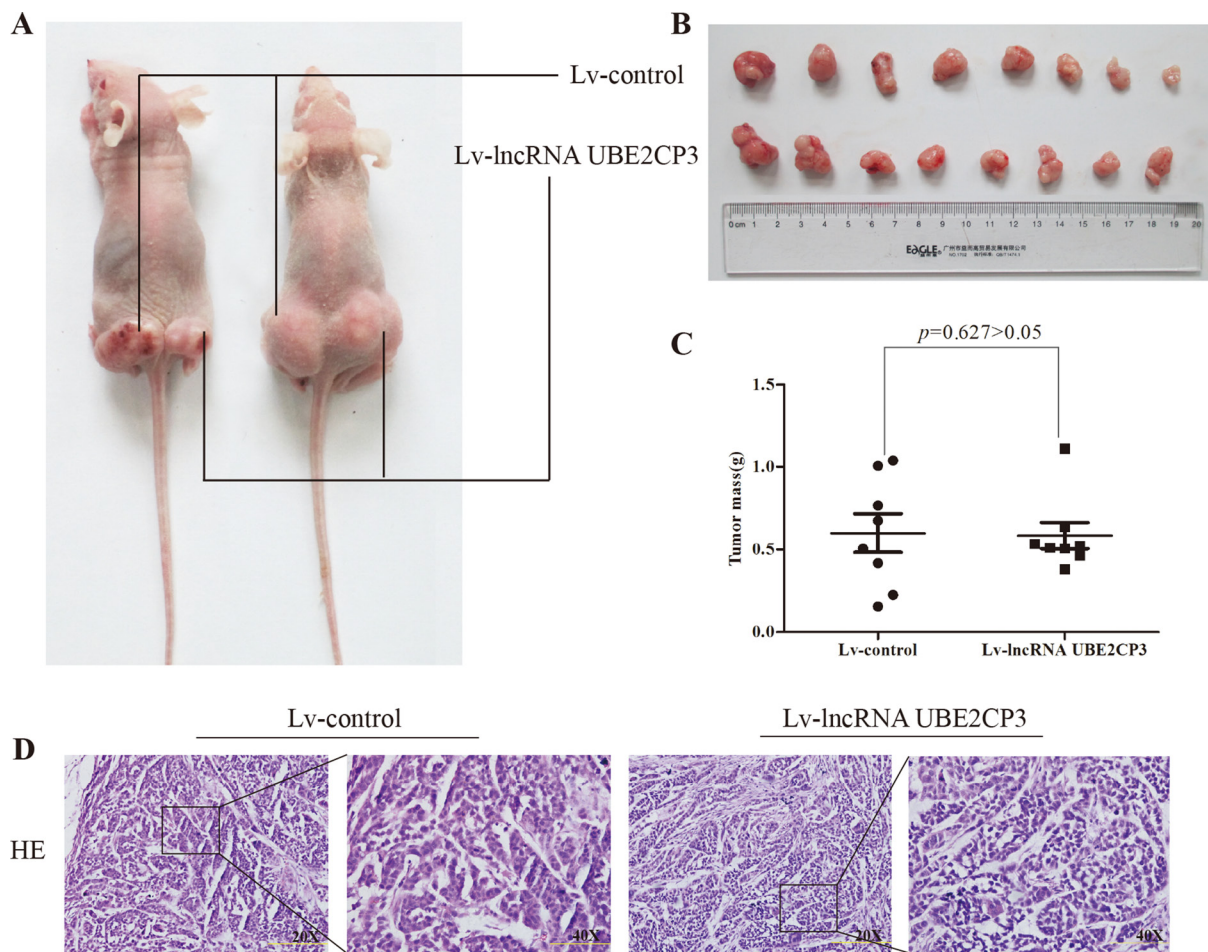

**Supplementary Figure 2: LncRNA UBE2CP3 has no effect on tumor growth *in vivo*.** (A–B) Photographs of tumors and images that developed in xenograft-transplanted nude mouse tumor models 5 weeks after injection of lncRNA UBE2CP3-over-expressing or control HepG2 cells. (C) Weights of xenografts established by subcutaneous transplantation with Lv-lncRNA UBE2CP3-overexpressing and Lv-control HepG2 cells 5 weeks after cell injection. (D) HE-stained paraffin-embedded sections obtained from xenografts.

**Supplementary Table 1: Clinicopathologic characteristics of 80 serum HCC patients**

| <b>Feature</b>          | <b>N(%)</b> |
|-------------------------|-------------|
| <b>Age,y</b>            |             |
| < = 55                  | 48 (60.0)   |
| > 55                    | 32 (40.0)   |
| <b>Gender</b>           |             |
| Male                    | 71 (88.7)   |
| Female                  | 9 (11.3)    |
| <b>HBsAg</b>            |             |
| Positive                | 69 (86.2)   |
| Negative                | 11 (13.8)   |
| <b>Tumor size,cm</b>    |             |
| < = 5                   | 39 (48.7)   |
| > 5                     | 41 (51.3)   |
| <b>AFP level, ng/ml</b> |             |
| < = 20                  | 56 (70.0)   |
| > 20                    | 24 (30.0)   |
| <b>Cirrhosis</b>        |             |
| Yes                     | 61 (76.2)   |
| No                      | 19 (23.8)   |
| <b>Tumors, n</b>        |             |
| Solitary                | 70 (87.5)   |
| Multiple                | 10 (12.5)   |
| <b>Smoking</b>          |             |
| Yes                     | 33 (41.2)   |
| No                      | 47 (58.8)   |
| <b>Alcohol</b>          |             |
| Yes                     | 24 (30.0)   |
| No                      | 56 (70.0)   |

**Supplementary Table 2: Sequences of primers and shRNA used in this study**

| Name                            |           | Sequences                                                   |
|---------------------------------|-----------|-------------------------------------------------------------|
| <b>qRT-PCR primers</b>          |           |                                                             |
| <b>lncRNA UBE2CP3</b>           | sense     | AAGTGGTCTGCCCTGTATGATG                                      |
|                                 | antisense | GAGCTATCAATGTTGGGTTTGC                                      |
| <b>E-cadherin</b>               | sense     | GTCCTGGGCAGACTGAATTT                                        |
|                                 | antisense | GACCAAGAAATGGATCTGTGG                                       |
| <b>N-cadherin</b>               | sense     | TGGACCATCACTCGGCTTA                                         |
|                                 | antisense | ACACTGGCAAACCTTCACG                                         |
| <b>Snail1</b>                   | sense     | ACCACTATGCCGCGCTCTT                                         |
|                                 | antisense | GGTCGTAGGGCTGCTGGAA                                         |
| <b><math>\beta</math>-actin</b> | sense     | TGGCACCCAGCACAATGAA                                         |
|                                 | antisense | CTAAGTCATAGTCCGCCTAGAAGCA                                   |
| <b>U6</b>                       | sense     | CTCGCTTCGGCAGCACA                                           |
|                                 | antisense | AACGCTTCACGAATTTGCGT                                        |
| <b>shRNA sequences</b>          |           |                                                             |
| <b>sh-lncRNA UBE2CP3</b>        |           | CCGGCCCAGGGTAATATCTGCCTCTCAAGAGAAGGCAGATATTACCCTGGGTTTTTTTG |

**Supplementary Table 3: Information of antibodies used in this study**

| Antibody                                   | WB     | IHC   | Specificity       | Company                   |
|--------------------------------------------|--------|-------|-------------------|---------------------------|
| <b>E-cadherin (24E10)</b>                  | 1:1000 | 1:400 | Rabbit monoclonal | Cell Signaling Technology |
| <b>N-cadherin (D4R1H)</b>                  | 1:1000 | 1:125 | Rabbit monoclonal | Cell Signaling Technology |
| <b>Snail1 (WL01863)</b>                    | 1:1000 | /     | Rabbit polyclonal | Wanleibio                 |
| <b><math>\beta</math>-actin (bs-0061R)</b> | 1:2000 | /     | Rabbit polyclonal | Bioss                     |

WB, western blot; IHC, immunohistochemistry.
